# Supplementary material
Source: PubMed Central journal article supplement (PMC10524031)
Supplement: NIHMS1898637-supplement-1.pdf [file NIHMS1898637-supplement-1.pdf]

## **Supplementary Information**

### **Tumor-derived small extracellular vesicles inhibit the efficacy of CAR T cells against solid tumors**

**Wenqun Zhong, Zebin Xiao, Zhiyuan Qin, Jingbo Yang, Yi Wen, Ziyang Yu, Yumei Li, Neil C. Sheppard, Serge Y. Fuchs, Xiaowei Xu, Meenhard Herlyn, Carl H. June, Ellen Puré, and Wei Guo**

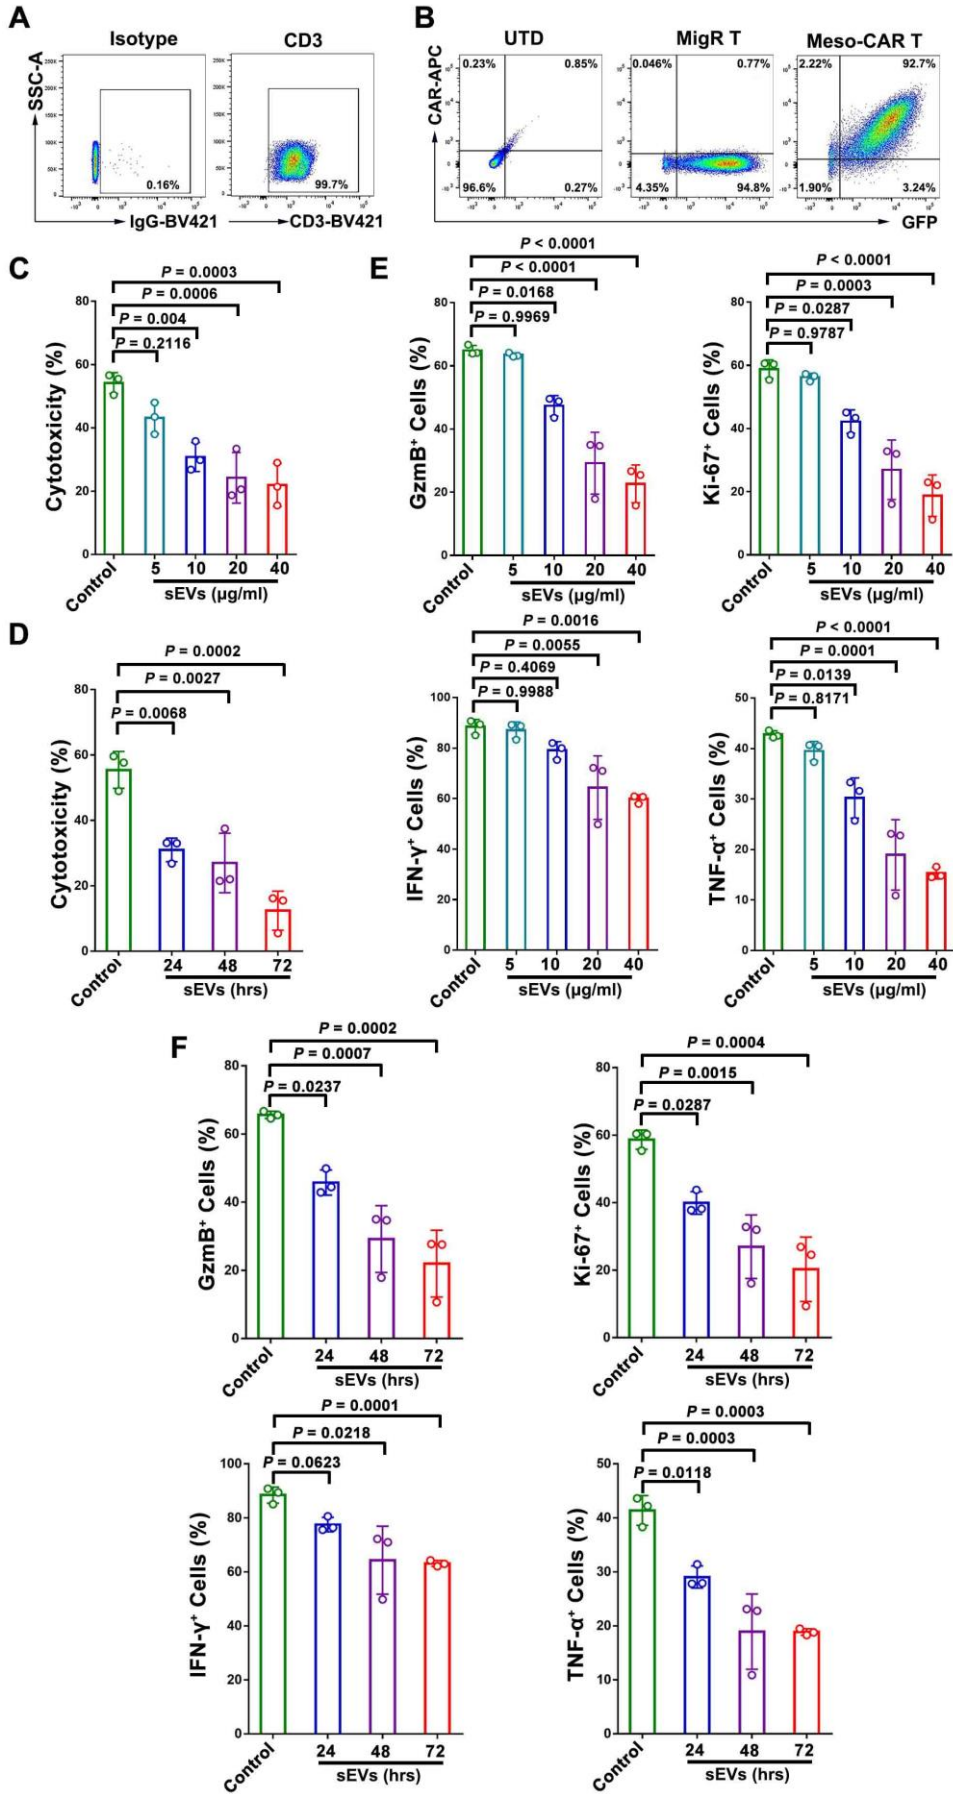

**Figure S1. sEVs released from 4662 cells inhibit Meso-CAR T cells in a dose and time-dependent manner.** **A**, Purity of isolated mouse T cells used in the study, as analyzed by CD3<sup>+</sup> cells using flow cytometry. **B**, The percentage of cells expressing Meso-CAR-GFP or MigR-GFP. **C**, Meso-CAR T cells were first treated with 5, 10, 20 and 40 µg/ml 4662 cell-derived sEVs, and then co-cultured with 4662 cells for 48 hrs. Apoptosis of tumor cells was detected by flow cytometry analysis of cleaved caspase-3. **D**, Meso-CAR T cells were first treated with 20 µg/ml 4662 cell-derived sEVs for 24, 48 and 72 hrs, and then co-cultured with 4662 cells for 48 hrs. Apoptosis of tumor cells detected by flow cytometry analysis of cleaved caspase-3 is shown. **E**, Quantification of cells with GzmB, Ki-67, IFN-γ and TNF-α expression in Meso-CAR T cells after treatments with indicated amounts of 4662 cell-derived sEVs. **F**, Quantification of cells with GzmB, Ki-67, IFN-γ and TNF-α expression in Meso-CAR T cells after indicated hours of treatments with 4662 cell-derived sEVs. Statistical analysis is performed using Welch ANOVA with Sidak's T3 multiple comparison tests (**C-F**).

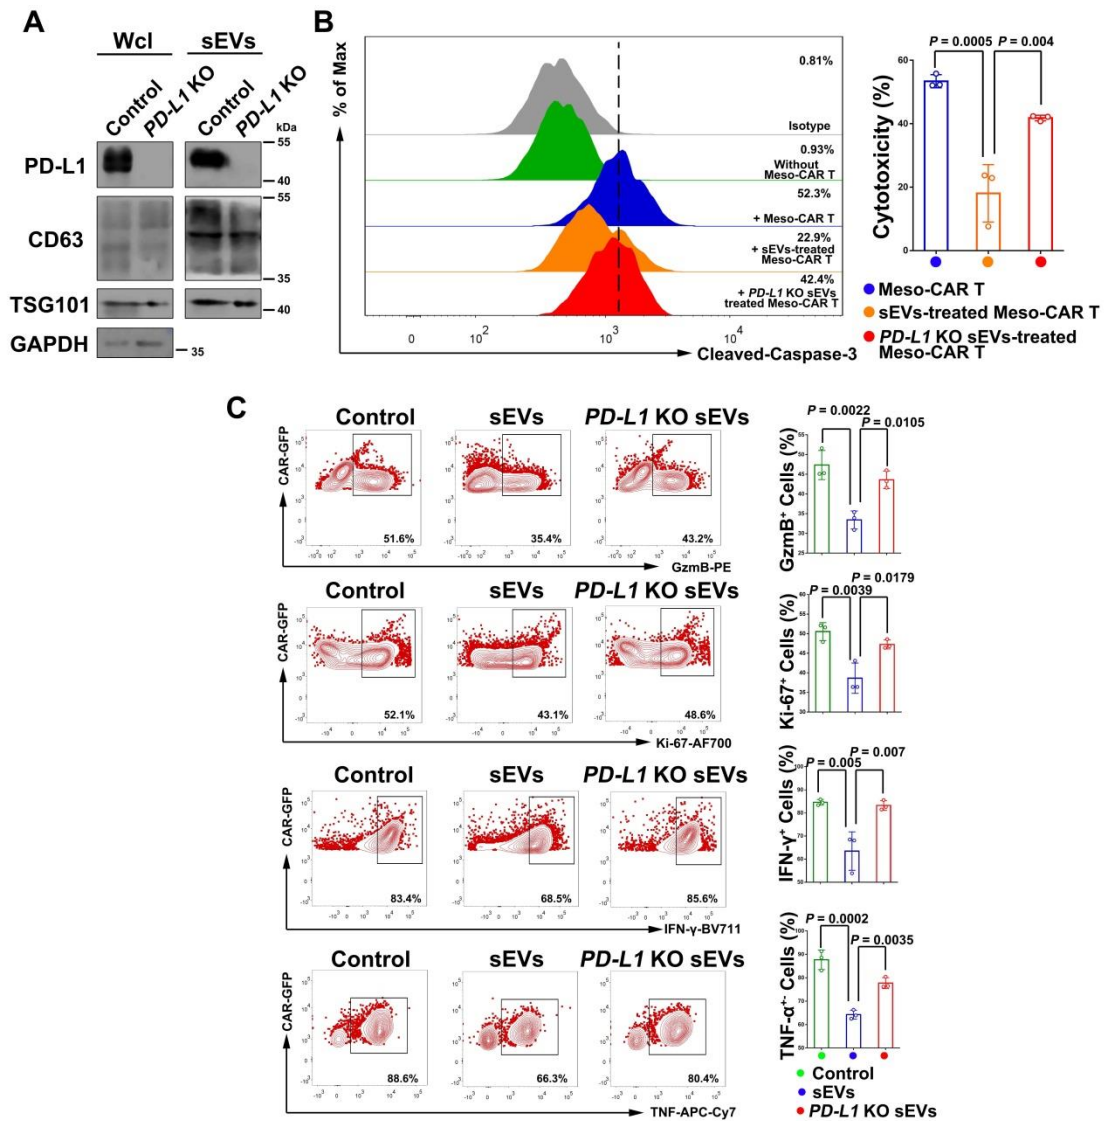

**Figure S2. sEVs released from 4662 cells inhibit Meso-CAR T cells.** **A**, Immunoblot analysis of PD-L1 and exosome markers (CD63 and TSG101) in the whole cell lysate (“Wcl”) and purified sEVs from control and *PD-L1* knockout (“*PD-L1* KO”) 4662 cells. The same amounts of proteins were loaded in each lane. **B**, Meso-CAR T cells were first treated with PBS, sEVs, sEVs with or without *PD-L1* KO, and then co-cultured with 4662 cells for 48 hrs. Apoptosis of tumor cells detected by flow cytometry analysis of cleaved caspase-3 is shown (left panel), and the relative cytotoxicity is calculated (right panel). **C**, Representative flow cytometric images of Meso-CAR T cells examined for the expression of GzmB, Ki-67, IFN- $\gamma$  and TNF- $\alpha$  after indicated treatments. Quantification of cells with positive GzmB, Ki-67, IFN- $\gamma$  and TNF- $\alpha$  expression in Meso-CAR T cells after indicated treatments is shown at the right. Data represent mean  $\pm$  s.d. (n=3). Statistical analysis is performed using one-way ANOVA analysis with Dunnett’s multiple comparison tests (**B**, **C**).

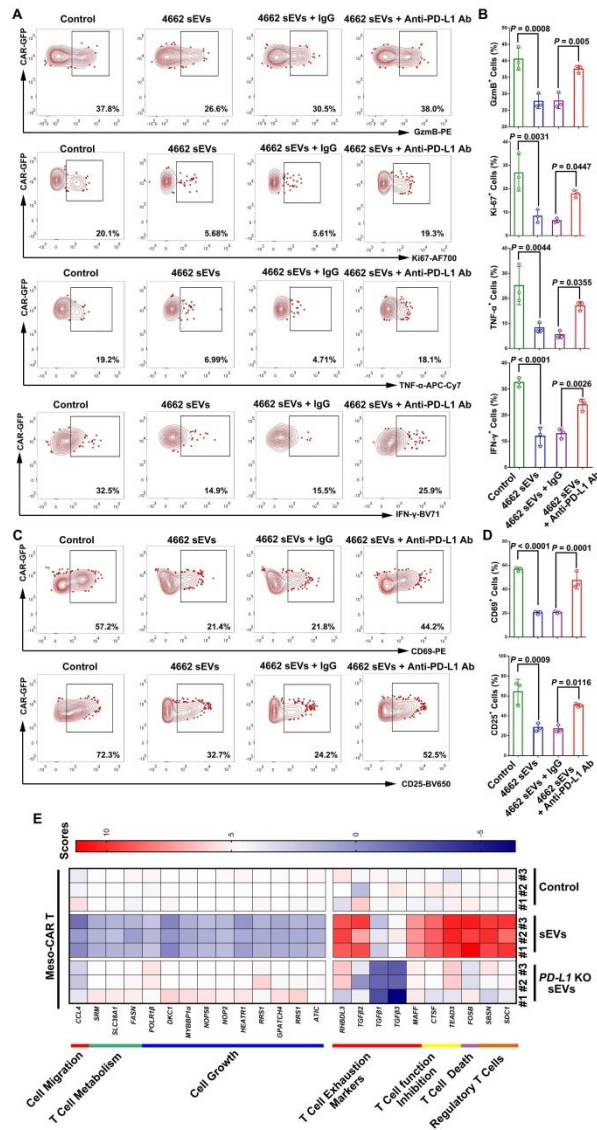

**Figure S3. Tumor cell-derived sEVs had a significantly inhibitory effect on the activation of CAR T cells.** **A**, Meso-CAR T cells were treated with a smaller amount of CD3/CD28 beads to achieve lower levels of activation (see Materials and Methods for details). Representative flow cytometry images of Meso-CAR T cells examined for the expression of GzmB, Ki-67, interferon gamma (IFN-γ) and tumor necrosis factor-α (TNF-α) after indicated treatments with sEVs derived from 4662 cells. **B**, Quantification of cells with GzmB, Ki-67, TNF-α and IFN-γ expression in Meso-CAR T cells after indicated treatments is shown. **C**, Representative flow cytometry images of Meso-CAR T cells examined for the expression of CD69 and CD25 after indicated treatments. Quantification of cells with CD69 and CD25 expression in Meso-CAR T cells after indicated treatments is shown to the right. **D**, Quantification of Meso-CAR T cells with CD69 and CD25 expression by flow cytometry analysis. **E**, Heatmap showing the expression levels of the representative genes in Meso-CAR T cells with or with indicated sEV treatment. Data represent mean ± s.d. (n=3). Statistical analysis is performed using Welch ANOVA with Sidak's T3 multiple comparison tests (**B**, **D**).

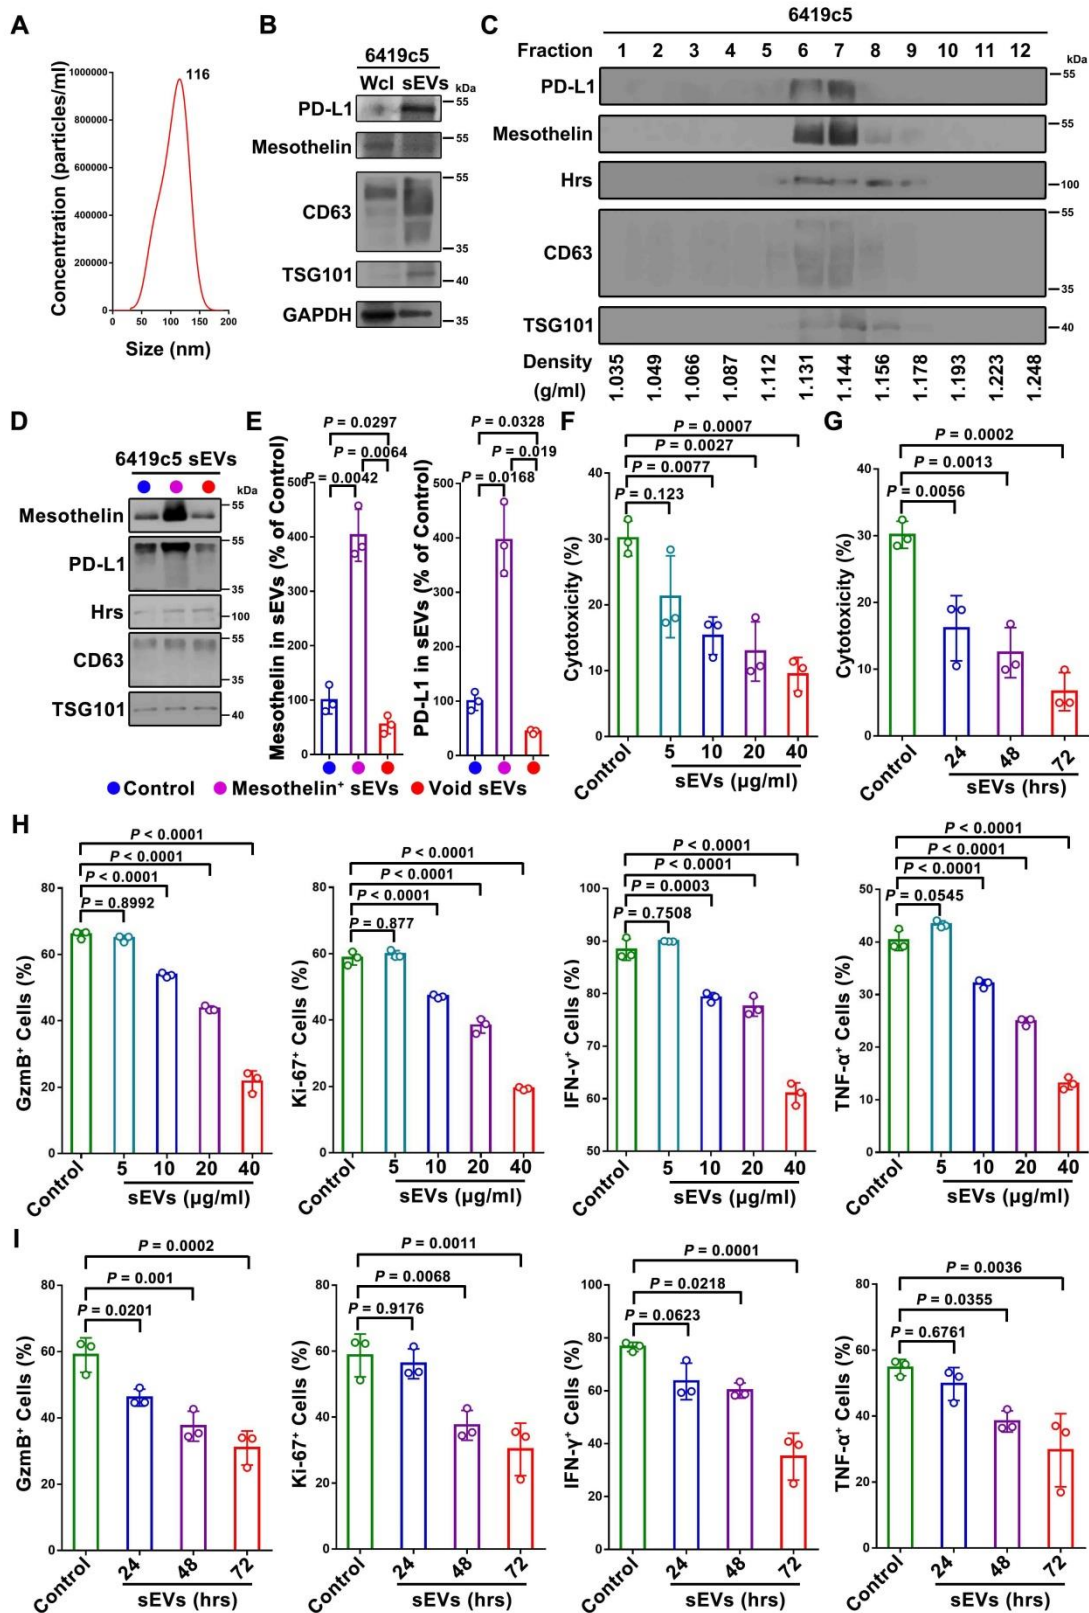

**Figure S4. sEVs released from 6419c5 cells inhibit Meso-CAR T cells.** **A**, Nanoparticle tracking analysis of sEVs purified from 6419c5 cells. The X-axis represents the diameters of the particles and the Y-axis represents the concentration (particles/ml) of the sEVs. **B**, Western blot analysis of PD-L1, mesothelin and exosome marker proteins (CD63 and TSG101) in the

whole cell lysate (“Wcl”), and purified sEVs from 6419c5 cells. All lanes were loaded with equal amounts of proteins. **C**, PD-L1 and mesothelin co-fractionated with exosome marker proteins (Hrs, CD63 and TSG101) on density gradients from 6419c5 cell-derived sEVs. **D**, Enrichment of mesothelin<sup>+</sup> sEVs from 6419c5 cell-derived sEVs by magnetic beads. See Materials and Methods for details. Characterization of mesothelin<sup>+</sup> sEVs and remaining (“Void sEVs”) sEVs by western blotting. The expression levels of mesothelin and exosome marker proteins (Hrs, CD63 and TSG101) in indicated sEVs are shown. An equal amount of sEV proteins from the different fractions was loaded on the gel. **E**, Quantification of sEV mesothelin (left) and PD-L1 (right) levels in 6419c5 cell-derived sEVs in different fractions. **F**, Meso-CAR T cells were treated with PBS, 5, 10, 20 and 40 µg/ml of 6419c5 cell-derived sEVs, and then co-cultured with 6419c5 cells for 48 hrs. Apoptosis of 6419c5 cells was assayed by flow cytometry using cleaved caspase-3. Relative cytotoxicity is shown. **G**, Meso-CAR T cells treated with PBS or 20 µg/ml 6419c5 cell-derived sEVs for 24, 48 and 72 hrs, and then co-cultured with 6419c5 cells for 48 hrs. Apoptosis of 6419c5 cells was assayed by flow cytometry using cleaved caspase-3. Relative cytotoxicity is shown. **H**, Quantification of cells with GzmB, Ki-67, IFN-γ and TNF-α expression in Meso-CAR T cells treated with PBS, or 5, 10, 20 and 40 µg/ml sEVs derived from 6419c5 cells. **I**, Quantification of cells with GzmB, Ki-67, IFN-γ and TNF-α expression in Meso-CAR T cells treated with PBS or 20 µg/ml sEVs derived from 6419c5 cells for 24, 48 and 72 hrs. Statistical analysis is performed using one-way ANOVA analysis with Dunnett’s multiple comparison tests (**E**), Welch ANOVA with Sidak’s T3 multiple comparison tests (**F-I**).

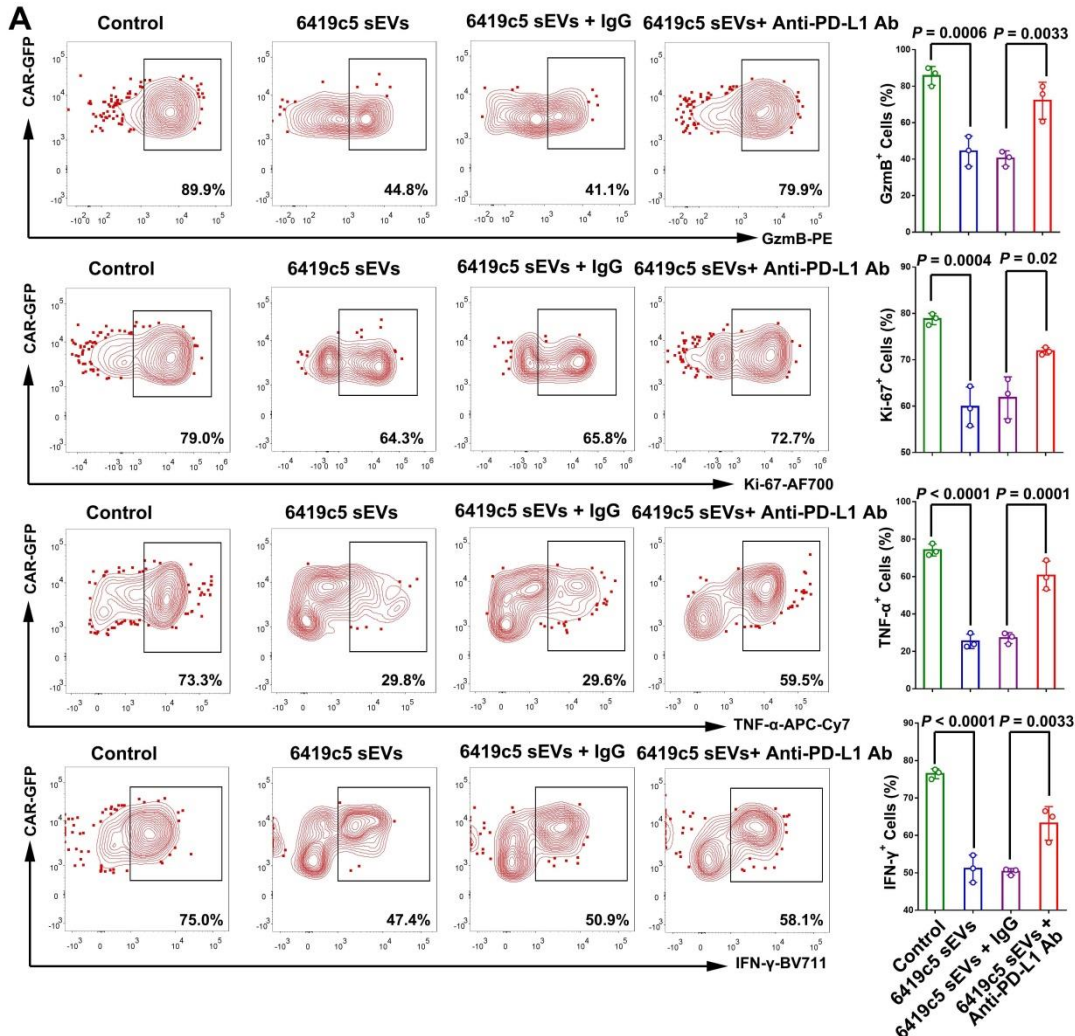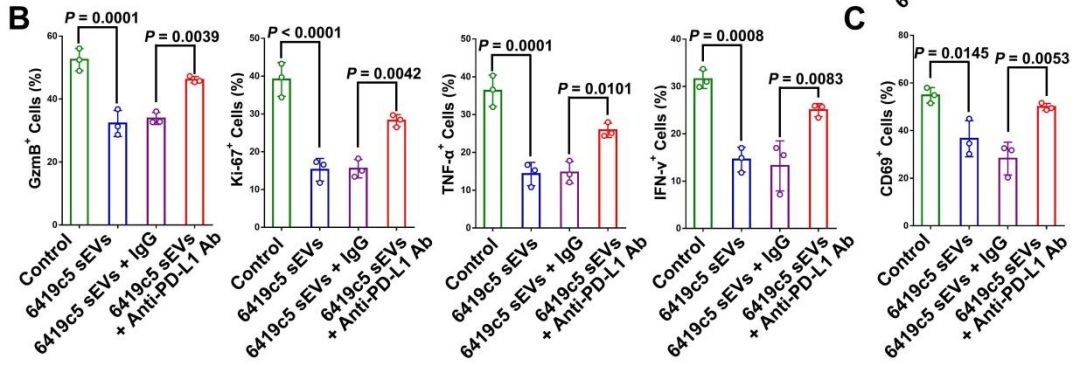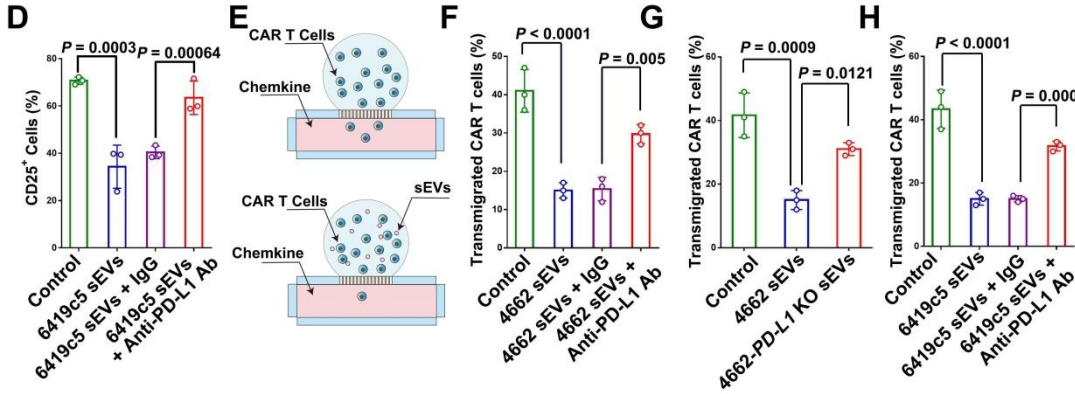



**Figure S5. PD-L1 mediates the inhibition of Meso-CAR T cells by sEVs.** **A**, Representative flow cytometric images of Meso-CAR T cells examined for the expression of GzmB, Ki-67, TNF- $\alpha$  and IFN- $\gamma$  after indicated treatments. Quantification of cells with positive GzmB, Ki-67, TNF- $\alpha$  and IFN- $\gamma$  expression in Meso-CART cells after indicated treatments is shown at the right. **B**, Meso-CAR T cells were treated with a smaller amount of CD3/CD28 beads to achieve lower levels of activation (see Materials and Methods for details). Representative flow cytometry images of Meso-CAR T cells examined for the expression of GzmB, Ki-67, tumor necrosis factor- $\alpha$  (TNF- $\alpha$ ) and interferon gamma (IFN- $\gamma$ ) after indicated treatments with sEVs derived from 6419c5 cells. Quantification of cells with GzmB, Ki-67, TNF- $\alpha$  and IFN- $\gamma$  expression in Meso-CAR T cells after indicated treatments is shown. **C**, Quantification of cells with CD69 expression in Meso-CAR T cells after indicated treatments is shown. **D**, Quantification of cells with CD25 expression in Meso-CAR T cells after indicated treatments is shown. **E**, Schema for the chemotaxis assay for Meso-CAR T cells migration with (above) or without (below) tumor cell-derived sEV treatment (See the details in Materials and Methods). **F** and **G**, Percentages of transmigrated Meso-CAR T cells treated with or without indicated sEVs derived from 4662 cells in chemotaxis assay. **H**, Percentages of transmigrated Meso-CAR T cells treated with or without indicated sEVs derived from 6419c5 cells in chemotaxis assay. Data represent mean  $\pm$  s.d. (n=3). Statistical analysis is performed using Welch ANOVA with Sidak's T3 multiple comparison tests (**A-D**, **F**, **H**), or one-way ANOVA analysis with Dunnett's multiple comparison tests (**G**).

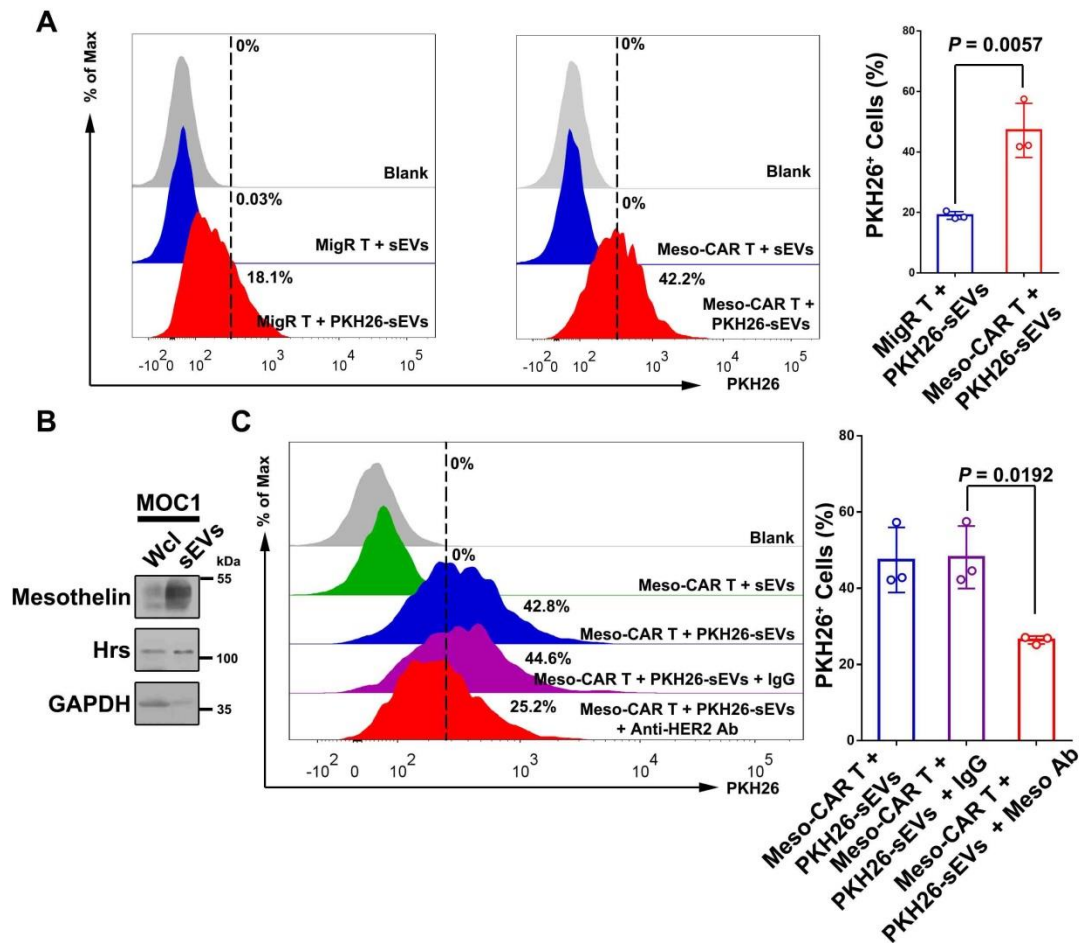

**Figure S6. Mesothelin mediates the adhesion of MOC1 cell-derived sEVs to Meso-CAR T cells.** **A**, Representative images of flow cytometry of MigR T cells and Meso-CAR T cells after incubation with PKH26-labeled MOC1 cell-derived sEVs. Quantification of the proportion of sEV-bound MigR T cells and Meso-CAR T cells is shown to the right. **B**, Western blot showing sEVs derived from MOC1 cells contain mesothelin. The same amounts of proteins were loaded in each lane. **C**, Representative images of flow cytometry of MigR T cells and Meso-CAR T cells after incubation with PKH26-labeled MOC1 cell-derived sEVs, which were treated with or without IgG or anti-mesothelin antibody. Quantification of the percentages of sEV-bound HER2-CAR T cells is shown to the right. Data represent mean  $\pm$  s.d. (n=3). Statistical analysis is performed using two-sided unpaired *t*-test (**A**) or one-way ANOVA analysis with Dunnett's multiple comparison tests (**C**).

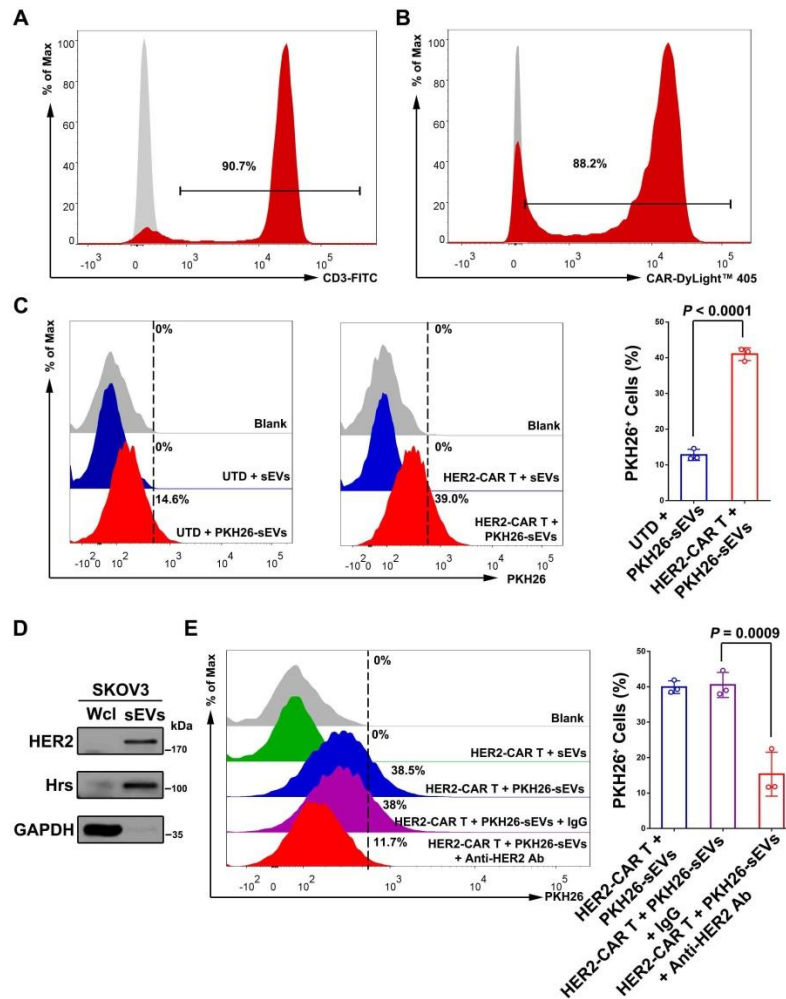

**Figure S7. HER2 mediates the adhesion of SKOV3 cell-derived sEVs to HER2-CAR T cells.** **A**, The purity of isolated human T cells used in the study. **B**, Transfection efficiency of human HER2-CAR T cells. **C**, Representative images of flow cytometry of untransduced (“UTD”) and HER2-CAR T cells after incubation with PKH26-labeled SKOV3 cell-derived sEVs. Quantification of the proportion of sEV-bound UTD control and HER2-CAR T cells is shown to the right. **D**, Western blot showing sEVs derived from SKOV3 cells had high level of HER2 in the sEVs. The same amounts of proteins were loaded in each lane. **E**, Representative images of flow cytometry of control cells UTD and HER2-CART cells after incubation with PKH26-labeled SKOV3 cell-derived sEVs, which were treated with or without IgG or anti-HER2 antibody. Quantification of the percentages of sEV-bound UTD control and HER2-CAR T cells is shown to the right. Data represent mean  $\pm$  s.d. ( $n=3$ ). Statistical analysis is performed using two-sided unpaired  $t$ -test (**C**) or one-way ANOVA analysis with Dunnett’s multiple comparison tests (**E**).

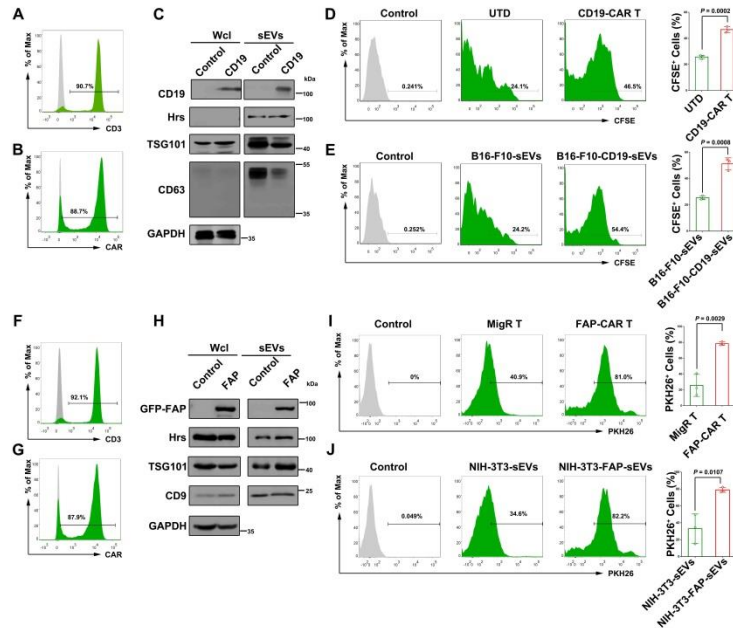

**Figure S8. CD19 and FAP regulated the adhesion of sEVs to the CD19-CAR or FAP-CAR T cells, respectively.** **A**, The purity of isolated mouse T cells used in the study. **B**, Transfection efficiency of mouse CD19-CAR. **C**, Western blot showing sEVs derived from B16-F10-CD19 cells had higher level of CD19 compared to the control cells. **D**, Representative images of flow cytometry of untransduced T cells (“UTD”) and CD19-CAR T cells after incubation with CFSE-labeled B16-F10-CD19 cell-derived sEVs. Quantification of the percentages of sEV-bound UTD and CD19-CAR T cells is shown at the right. **E**, Representative images of flow cytometry of CD19-CAR T cells after incubation with CFSE-labeled B16-F10 or B16-F10-CD19 cell-derived sEVs. Quantification of the percentages of sEV-bound UTD and CD19-CAR T cells is shown at the right. **F**, The purity of isolated mouse T cells used in the study. **G**, Transfection efficiency of mouse CD19-CAR. **H**, Western blot showing sEVs derived from NIH-3T3-FAP cells had a higher level of FAP compared to control cells. **I**, Representative images of flow cytometry of MigR T cells (MigR T) and FAP-CAR T cells after incubation with PKH26-labeled NIH-3T3-FAP cell-derived sEVs. Quantification of the percentages of sEV-bound MigR T cells and FAP-CAR T cells is shown at the right. **J**, Representative images of flow cytometry of FAP-CAR T cells after incubation with PKH26-labeled NIH-3T3 or NIH-3T3-FAP cell-derived sEVs. Quantification of the percentages of sEV-bound control cells and FAP-CAR T cells is shown to the right. Data represent mean  $\pm$  s.d. (n=3). Statistical analysis is performed using two-sided unpaired *t*-test (**D**, **E**, **I**, **J**).

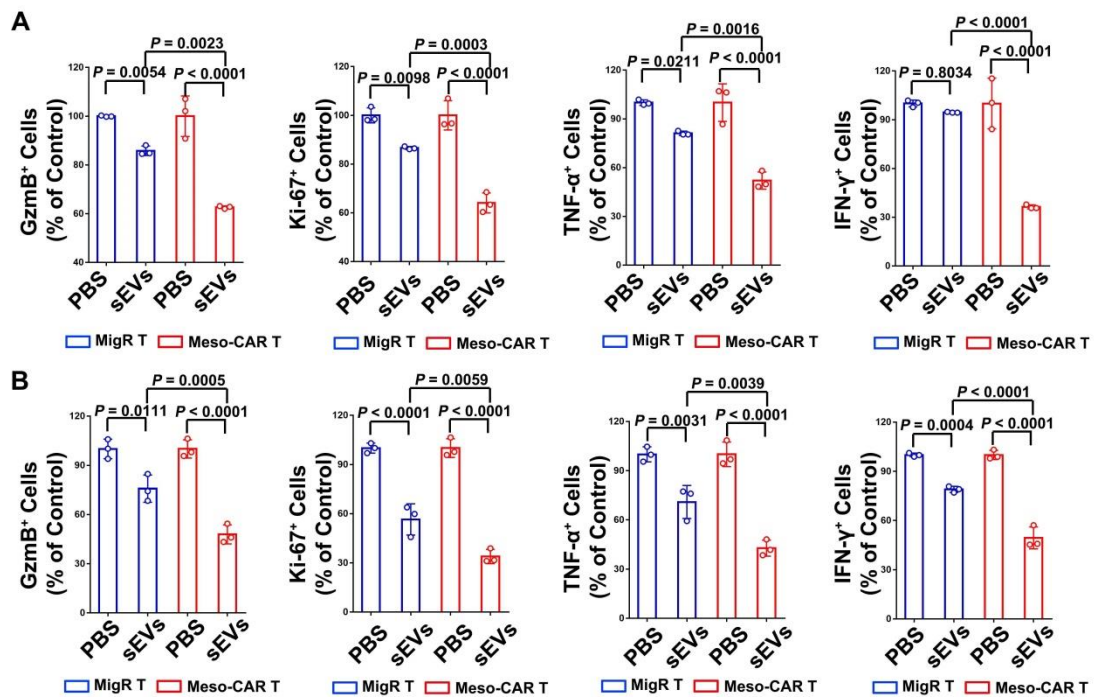

**Figure S9. sEVs from 6419c5 cells and MOC1 cells had a stronger inhibitory effect on Meso-CAR T cells than MigR T cells. A,** Quantification of MigR T cells and Meso-CAR T cells with GzmB, Ki-67, TNF- $\alpha$  and IFN- $\gamma$  expression after indicated 6419c5-derived sEV treatments. **B,** Quantification of MigR T cells and Meso-CAR T cells with GzmB, Ki-67, TNF- $\alpha$  and IFN- $\gamma$  expression after indicated treatments with MOC1-derived sEVs. Data represent mean  $\pm$  s.d. (n=3). Statistical analysis was performed using Welch ANOVA with Sidak's T3 multiple comparison tests (**A, B**).

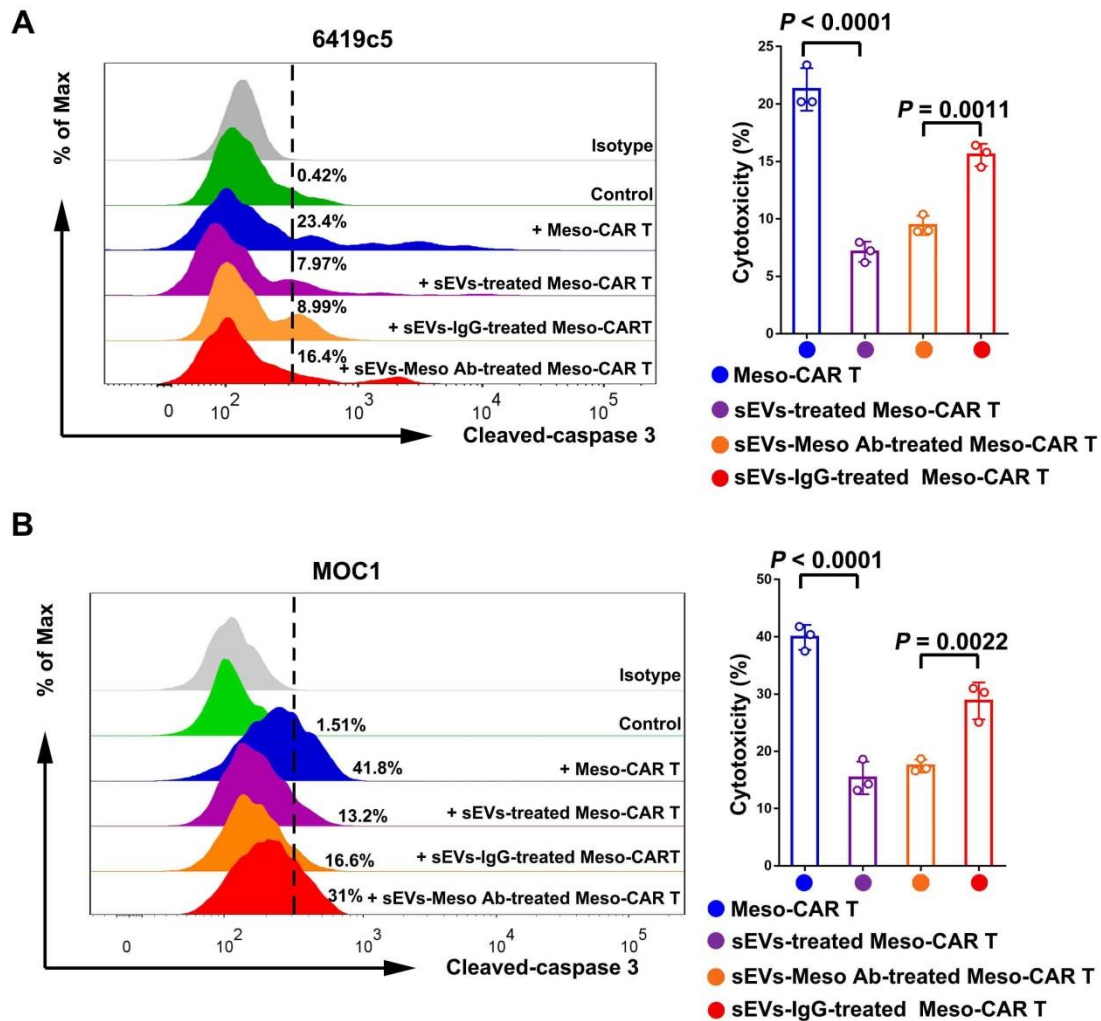

**Figure S10. Mesothelin contributes to the tumor killing of CAR T cells by 6419c5 cell and MOC1 cell-derived sEVs.** **A**, Meso-CAR T cells treated with PBS, sEVs, sEVs with or without IgG isotype or anti-mesothelin antibody blocking were co-cultured with 6419c5 cells for 48 hrs. Apoptosis of tumor cells detected by flow cytometry analysis of cleaved caspase-3 is shown to the left. The relative cytotoxicity is calculated and shown to the right. **B**, Meso-CAR T cells treated with PBS, sEVs, sEVs with or without IgG isotype or anti-mesothelin antibody blocking were co-cultured with MOC1 cells for 48 hrs. Apoptosis of tumor cells detected by flow cytometry analysis of cleaved caspase-3 is shown to the left. The relative cytotoxicity is calculated and shown to the right. Data represent mean  $\pm$  s.d. ( $n=3$ ). Statistical analysis was performed using Welch ANOVA with Sidak's T3 multiple comparison tests (**A**, **B**).

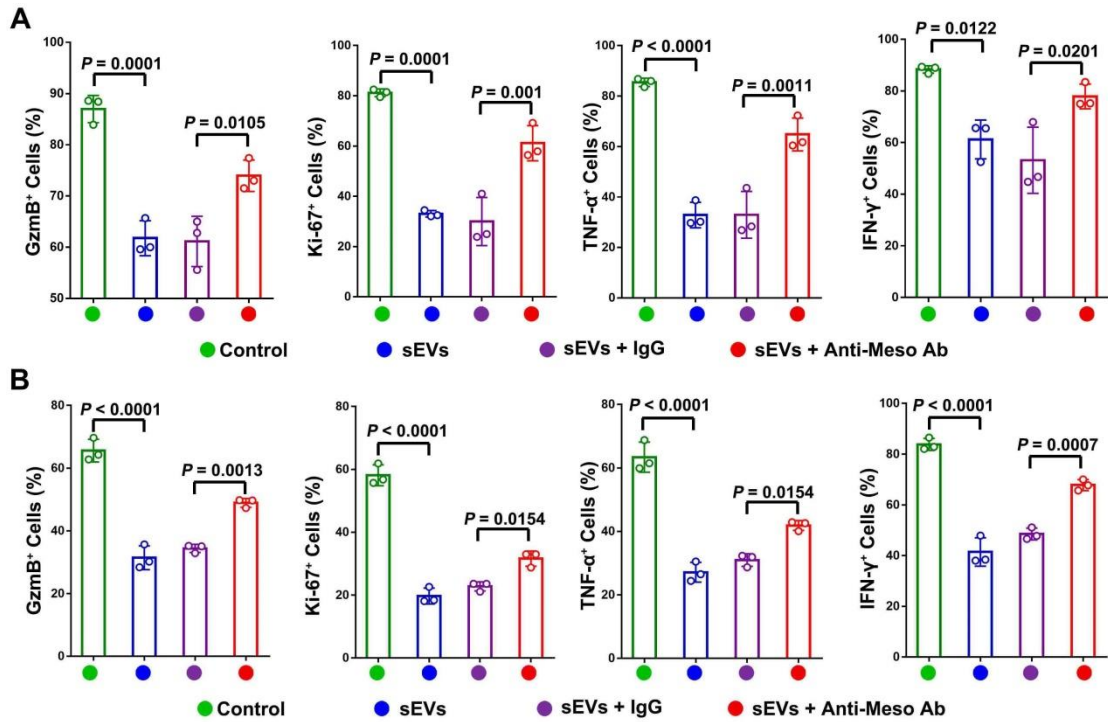

**Figure S11. Mesothelin contributes to the preferential inhibition of CAR T cells by MOC1 cell-derived sEVs. A,** Quantification of Meso-CAR T cells with GzmB, Ki-67, TNF- $\alpha$  and IFN- $\gamma$  expression after indicated treatments. sEVs were purified from 6419c5 cells. **B,** Quantification of Meso-CAR T cells with GzmB, Ki-67, TNF- $\alpha$  and IFN- $\gamma$  expression after indicated treatments. sEVs were purified from MOC1 cells. Data represent mean  $\pm$  s.d. (n=3). Statistical analysis was performed using Welch ANOVA with Sidak's T3 multiple comparison tests (**A, B**).

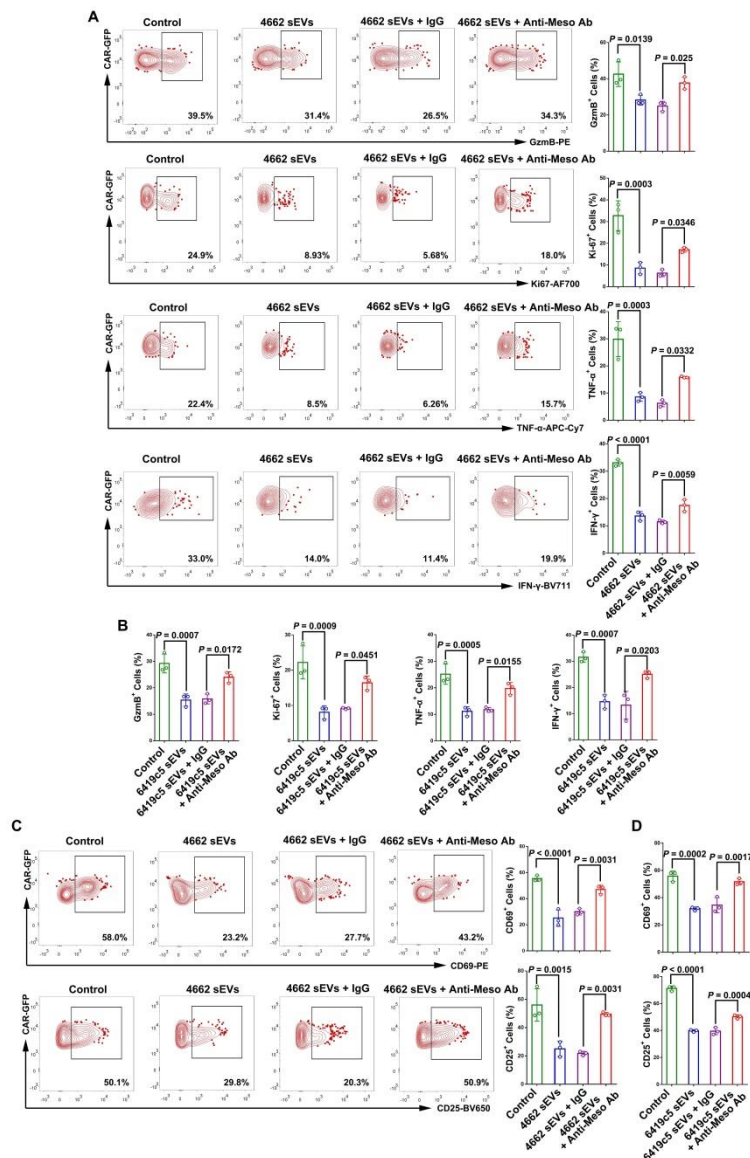

**Figure S12. sEV mesothelin contributes to the inhibitory effect on the activation of CAR T cells.** **A**, Meso-CAR T cells were treated with a smaller amount of CD3/CD28 beads to achieve lower levels of activation. Representative flow cytometry images of Meso-CAR T cells examined for the expression of GzmB, Ki-67, tumor necrosis factor- $\alpha$  (TNF- $\alpha$ ) and interferon gamma (IFN- $\gamma$ ) after different treatments with sEVs derived from 4662 cells. Quantification of Meso-CAR T cells with GzmB, Ki-67, TNF- $\alpha$  and IFN- $\gamma$  expression is shown to the right. **B**, Quantification of Meso-CAR T cells with GzmB, Ki-67, TNF- $\alpha$  and IFN- $\gamma$  expression after treatments with 6419c4 cell derived sEVs. **C**, Representative flow cytometry images of Meso-CAR T cells examined for their expression of CD69 and CD25 after indicated treatment with sEVs derived from 4662 cells. Quantification of cells with CD69 and CD25 expression in Meso-CAR T cells is shown to the right. **D**, Quantification of Meso-CAR T cell CD69 and CD25 expression after treatments with sEVs derived from 6419c5 cells. Data represent mean  $\pm$  s.d. (n=3). Statistical analysis is performed using Welch ANOVA with Sidak's T3 multiple comparison tests (**A-D**).



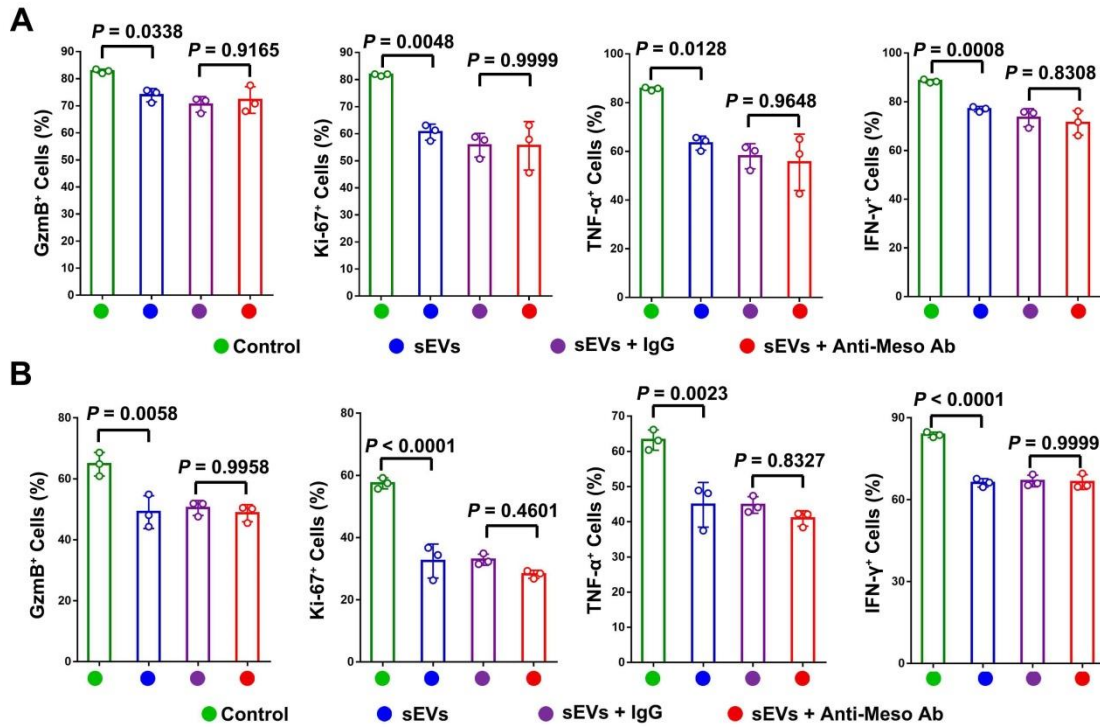

**Figure S13. Mesothelin has no significant inhibitory effect of tumor cell-derived sEVs on MigR T cells.** **A**, Quantification of MigR T cells with GzmB, Ki-67, TNF- $\alpha$  and IFN- $\gamma$  expression after indicated treatments. sEVs were purified from 6419c5 cells. **B**, Quantification of MigR T cells with GzmB, Ki-67, TNF- $\alpha$  and IFN- $\gamma$  expression after indicated treatments. sEVs were purified from MOC1 cells. Data represent mean  $\pm$  s.d. (n=3). Statistical analysis is performed using Welch ANOVA with Sidak's T3 multiple comparison tests (**A**, **B**).

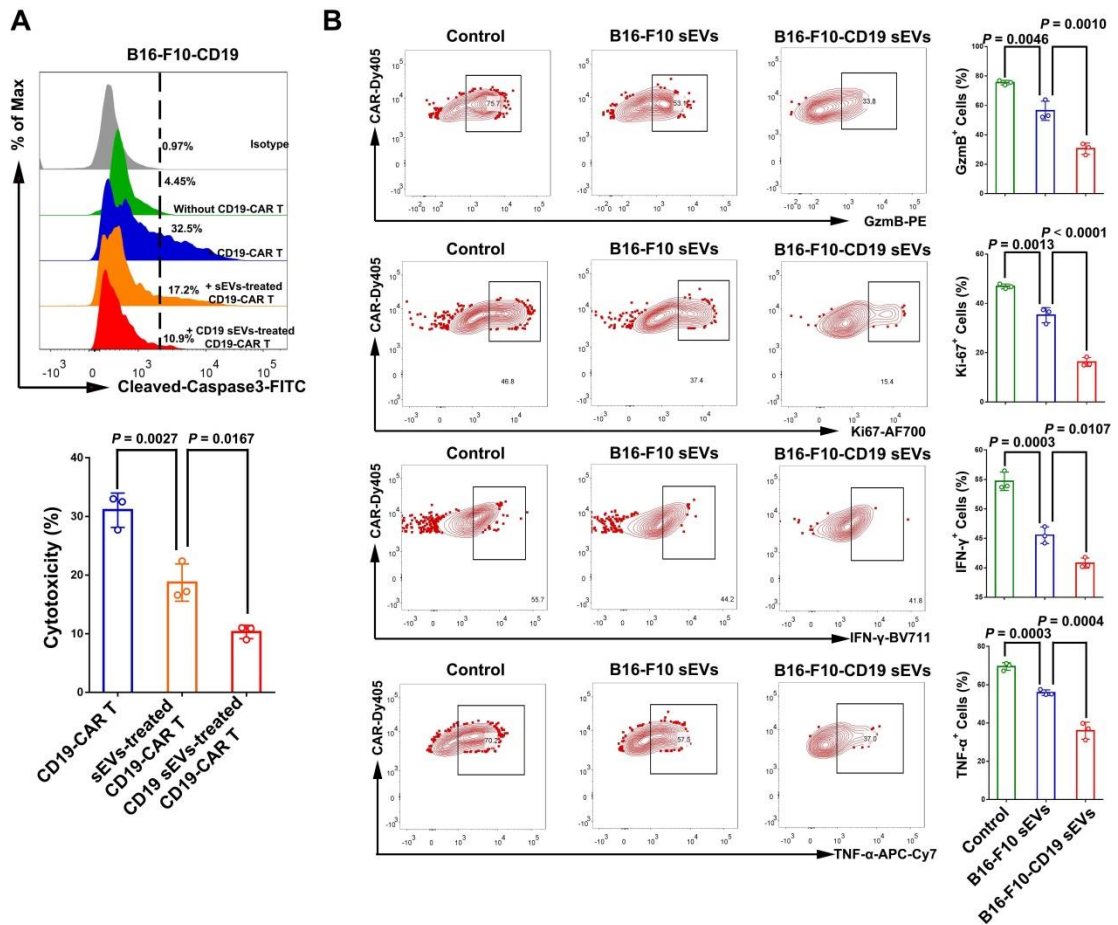

**Figure S14. CD19 enhances the inhibitory effect of sEVs on CD19-CAR T cells.** **A**, CD19-CAR T cells treated with PBS, sEVs derived from B16-F10 or B16-F10-CD19 cells were co-cultured with B16-F10-CD19 cells for 48 hrs. Apoptosis of tumor cells was detected by flow cytometry analysis of cleaved caspase-3 (upper panel), and the relative cytotoxicity was calculated (lower panel). **B**, Representative flow cytometry images of CD19-CAR T cells examined for the expression of GzmB, Ki-67, IFN- $\gamma$  and TNF- $\alpha$  after indicated treatments. Quantification of cells with GzmB, Ki-67, IFN- $\gamma$  and TNF- $\alpha$  expression in CD19-CAR T cells after indicated treatments is shown at the right. Data represent mean  $\pm$  s.d. (n=3). Statistical analysis was performed using one-way ANOVA analysis with Dunnett's multiple comparison tests (**A**, **B**).

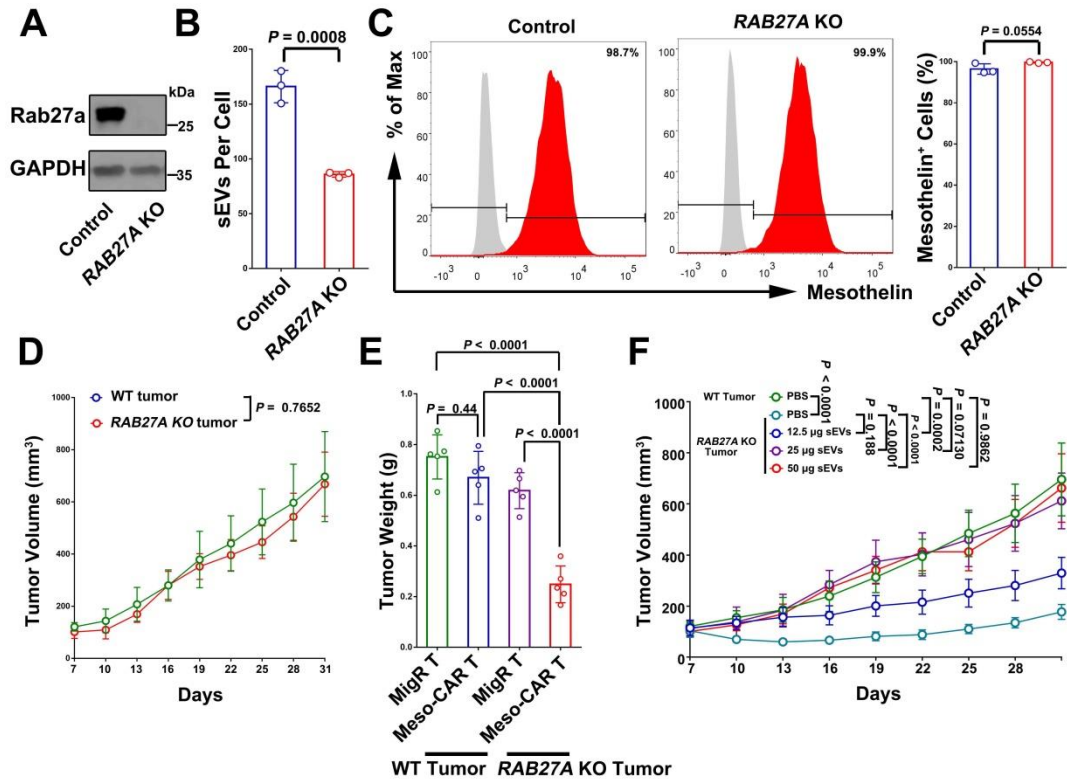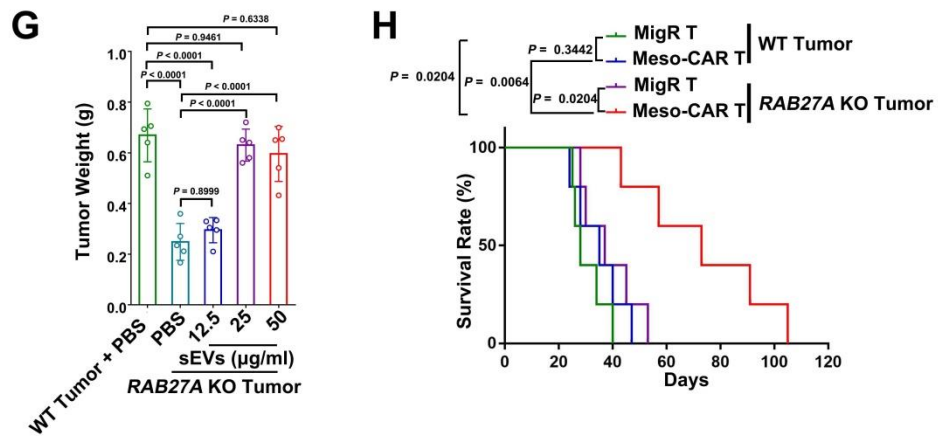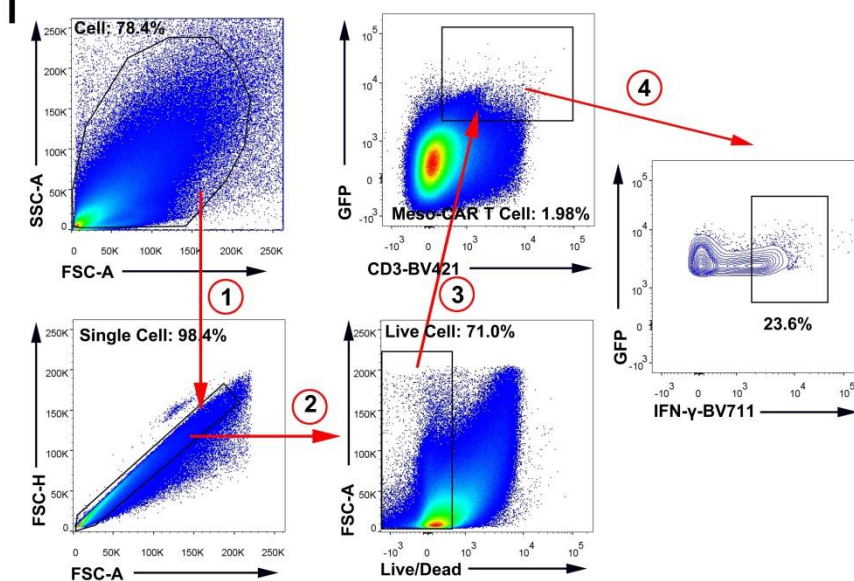

**Figure S15. Knockout of *RAB27A* (*RAB27A* KO) improved the therapeutic effect of Meso-CAR T cells without affecting surface expression of mesothelin.** **A**, Immunoblot analysis of Rab27a in the whole cell lysate from control and *RAB27A* knockout (“*RAB27A* KO”) 4662 cells. **B**, Quantification of sEVs release from 4662 cells with or without *RAB27A* KO by nanoparticle tracking analysis. **C**, Representative flow cytometry images of 4662 cells with or without *RAB27A* KO. Quantification of cells with positive mesothelin expression in 4662 cells after indicated treatment is shown to the right (n=3). **D**, Tumor growth of 4662 cells with or without *RAB27A* KO in mice (n=5). **E**, Tumor weights with indicated treatment (n=5). **F**, Growth curves of tumors in mice with indicated treatments. **G**, Tumor weights with indicated treatments. **H**, Survival rates of mice with indicated treatments (n=5). **I**, Representative contour plots showing the general gating strategy used in the analysis of IFN- $\gamma$ <sup>+</sup> Meso-CAR T cells. Data represent mean  $\pm$  s.d. Statistical analysis is performed using two-sided unpaired *t*-test (**B**, **C**, **D**), or Welch ANOVA with Dunnett’s T3 multiple comparison tests (**E-G**) or log-rank test (**H**).

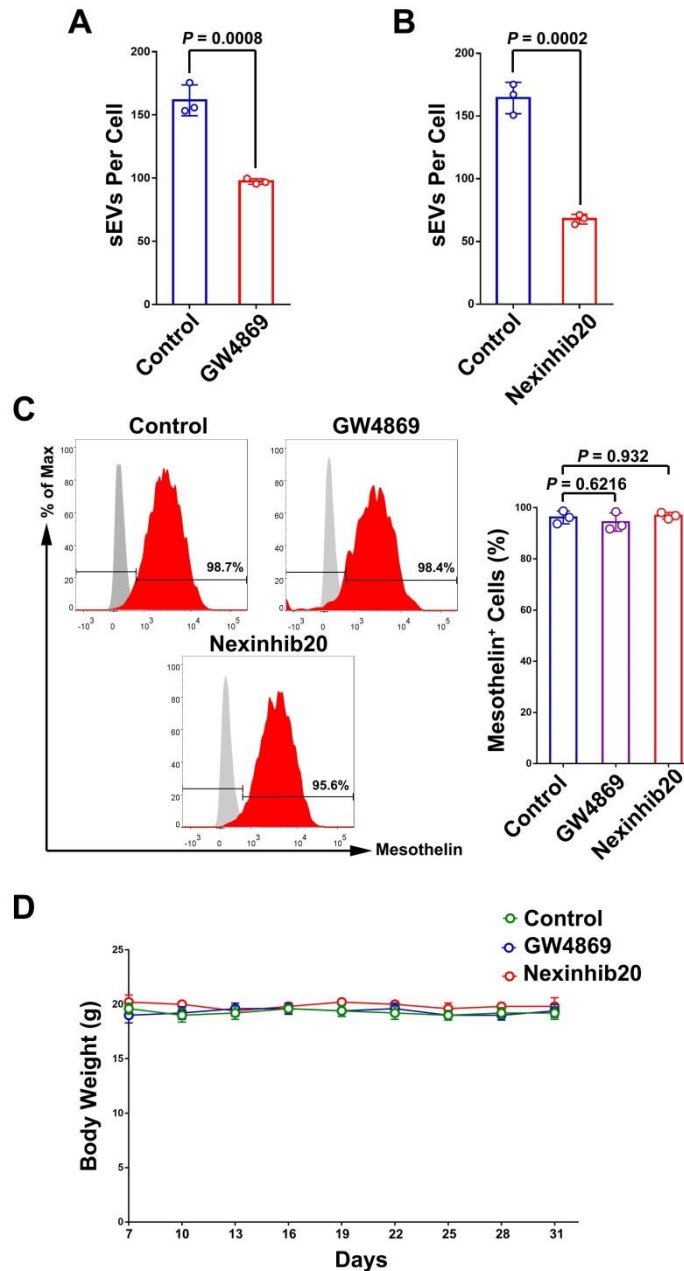

**Figure S16. GW4869 and Nexinhib20 inhibited sEV secretion from 4662 cells without affecting the surface expression of mesothelin. A and B,** Quantification of sEV release from 4662 cells with or without GW4869 treatment (**A**) or Nexinhib20 treatment (**B**) using nanoparticle tracking analysis. **C,** Representative flow cytometry images of 4662 cells with or without GW4869 or Nexinhib20 treatment. Quantification of cells with positive mesothelin expression in 4662 cells after indicated treatments is shown at the right. **D,** Body weight of mice with or without GW4869 or Nexinhib20 treatment (n=5). Data represent mean  $\pm$  s.d. (n=3 or indicated). Statistical analysis is performed using two-sided unpaired *t*-test (**A, B**), or one-way ANOVA analysis with Dunnett's multiple comparison tests (**C, D**).

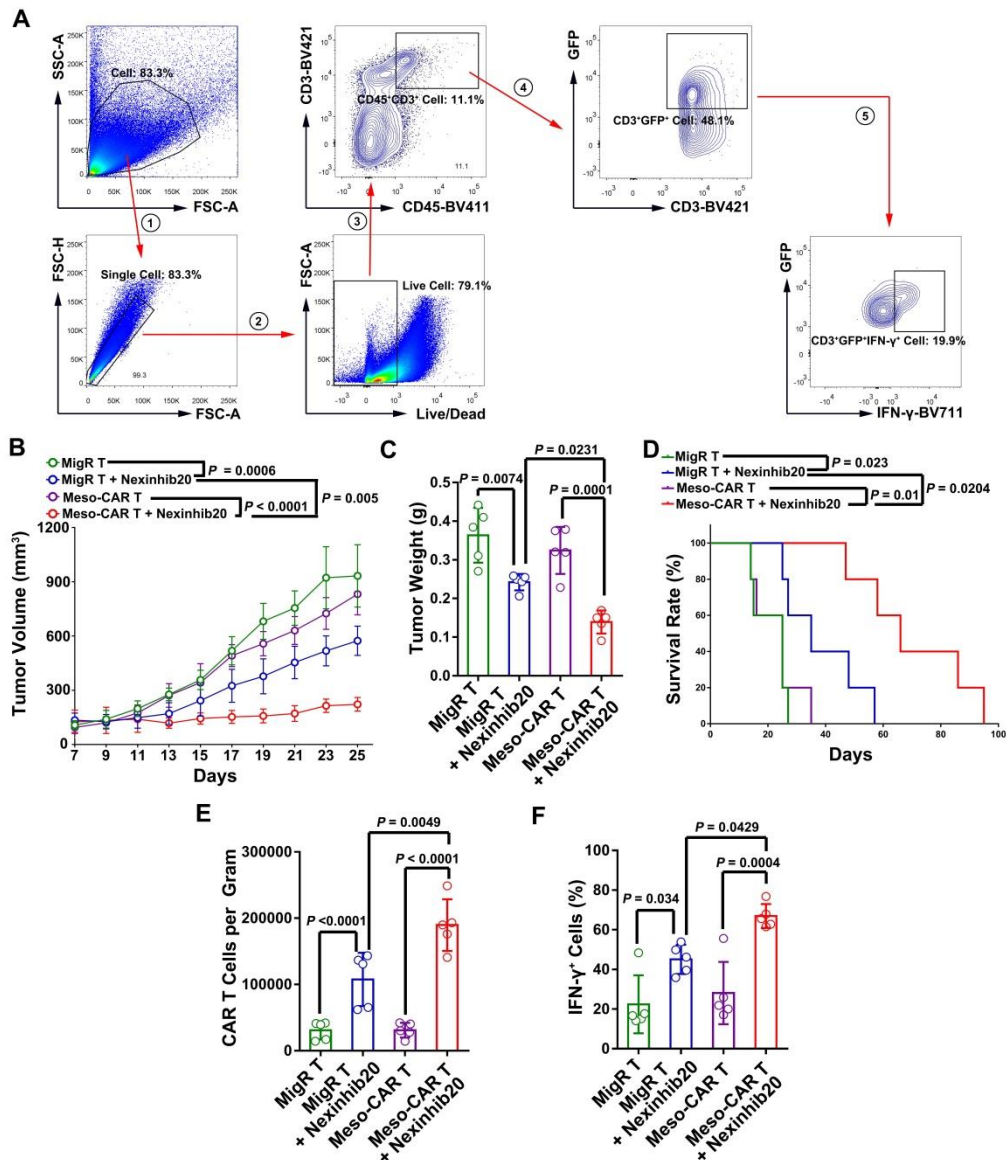

**Figure S17. Nexinhib20 boosted CAR T therapy in a PDAC mouse model. A,** Representative contour plots showing the general gating strategy used in the analysis of total Meso-CAR T cells, and IFN- $\gamma$ <sup>+</sup> Meso-CAR T cells in C57BL/6 mice with 4662 xenografts. **B,** Tumor growth in mice with indicated treatments. **C,** Tumor weights in mice with indicated treatment. **D,** Survival rates of mice with indicated treatments. **E,** The number of Meso-CART cells in tumors for each group of mice quantified from flow cytometry analysis. **F,** The percentages of IFN- $\gamma$ <sup>+</sup> Meso-CART cells quantified by flow cytometry. Data represent mean  $\pm$  s.d. (n=5). Statistical analysis is performed using Welch ANOVA with Dunnett's T3 multiple comparison tests (**B, C, E, F**) or log-rank test (**D**).

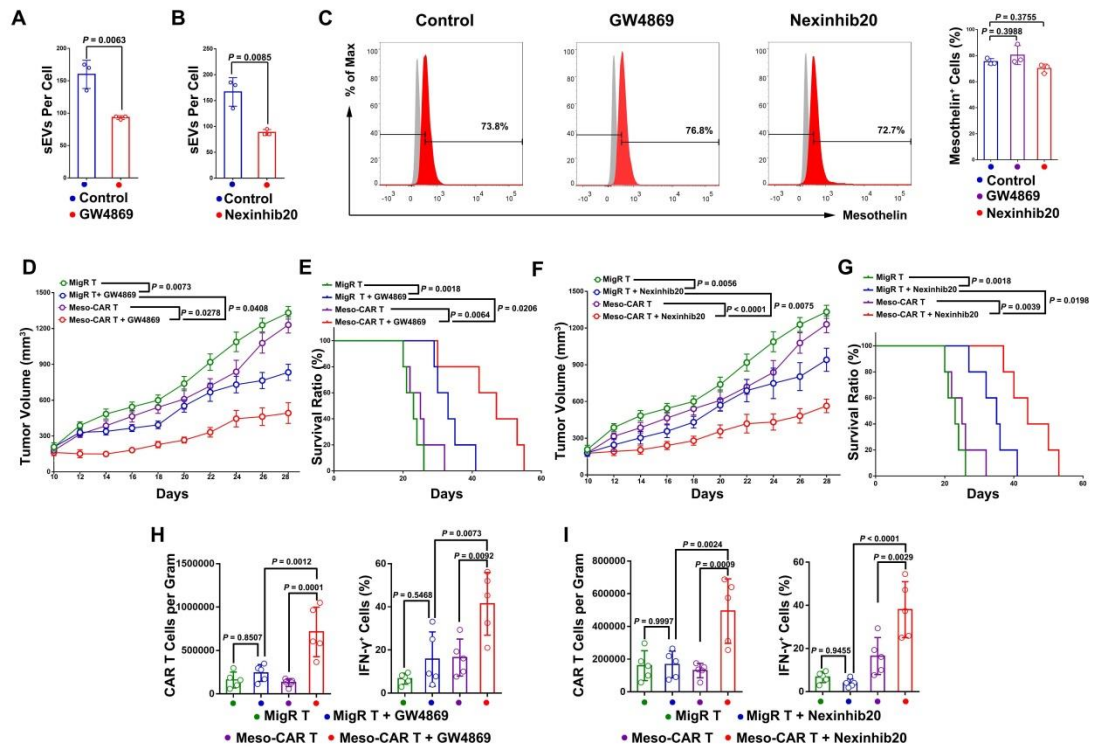

**Figure S18. GW4869 and Nexinhib20 boosted CAR T therapy in a murine oral squamous cell carcinoma model.** **A** and **B**, Quantification of sEV release from MOC1 cells with or without GW4869 treatment (**A**) or Nexinhib20 treatment (**B**) using nanoparticle tracking analysis. **C**, Representative flow cytometry images of mesothelin positive MOC1 cells with or without GW4869 or Nexinhib20 treatment. Quantification of cells with positive mesothelin expression in MOC1 cells after indicated treatments is shown at the right. **D**, Tumor growth in C57BL/6 mice with indicated GW4869 treatments. **E**, Survival rates of mice with indicated GW4869 treatments. **F**, Tumor growth in mice with indicated Nexinhib20 treatments. **G**, Survival rates of mice with indicated Nexinhib20 treatments. **H**, Related to GW4869 treatment, quantification of flow cytometry analysis of the number of Meso-CART cells in tumors for each group of mice (left panel), and the percentages of IFN- $\gamma$ <sup>+</sup> Meso-CART cells (right panel). **I**, Related to Nexinhib20 treatment, quantification of flow cytometry analysis of the number of Meso-CART cells in tumors for each group of mice (left panel), and the percentages of IFN- $\gamma$ <sup>+</sup> Meso-CART cells (right panel). Data represent mean  $\pm$  s.d. (**D-I**, n=5). Statistical analysis is performed using two-sided unpaired *t*-test (**A**, **B**), or one-way ANOVA analysis with Dunnett's multiple comparison tests (**C**), Welch ANOVA with Dunnett's T3 multiple comparison tests (**D**, **F**, **H**, **I**), log-rank test (**E**, **G**).

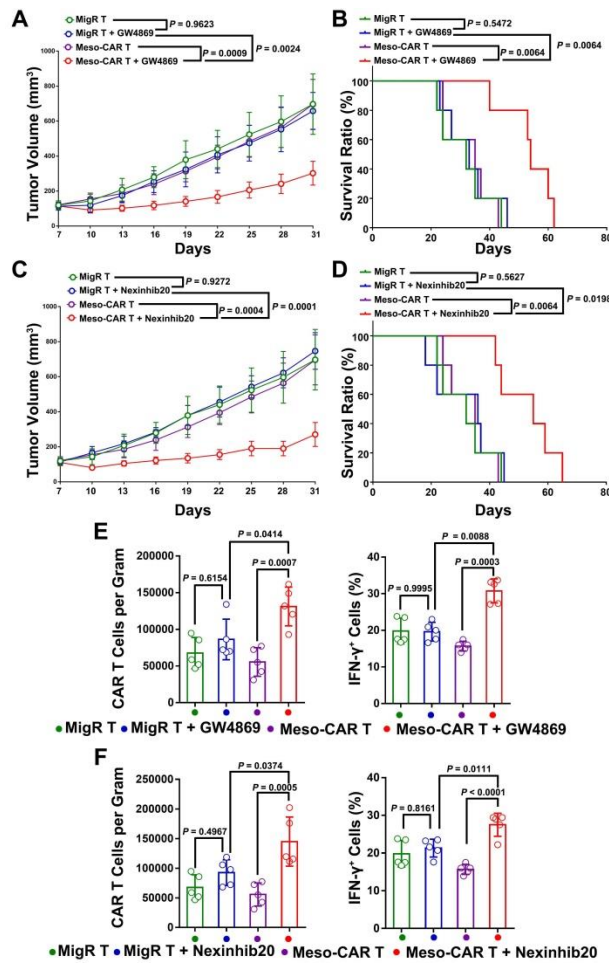

**Figure S19. GW4869 and Nexinhib20 boosted CAR T therapy in NSG mouse model with PDAC.** **A**, Related to GW4869 treatment, 4662 tumor growth in mice of indicated groups. **B**, Related to GW4869 treatment, survival rates of mice of indicated groups. **C**, Related to Nexinhib20 treatment, tumor growth in mice of indicated groups. **D**, Related to Nexinhib20 treatment, survival rates of mice of indicated groups. **E**, Related to GW4869 treatment, quantification of flow cytometry analysis of the number of Meso-CART cells in tumors for each group of mice (left panel), and the percentages of IFN- $\gamma$ <sup>+</sup> Meso-CART cells (right panel). **F**, Related to Nexinhib20 treatment, quantification of flow cytometry analysis of the number of Meso-CART cells in tumors for each group of mice (left panel), and the percentages of IFN- $\gamma$ <sup>+</sup> Meso-CART cells (right panel). Data represent mean  $\pm$  s.d. (n=5). Statistical analysis is performed using Welch ANOVA with Dunnett's T3 multiple comparison tests (**A**, **C**, **E**, **F**) or log-rank test (**B**, **D**).



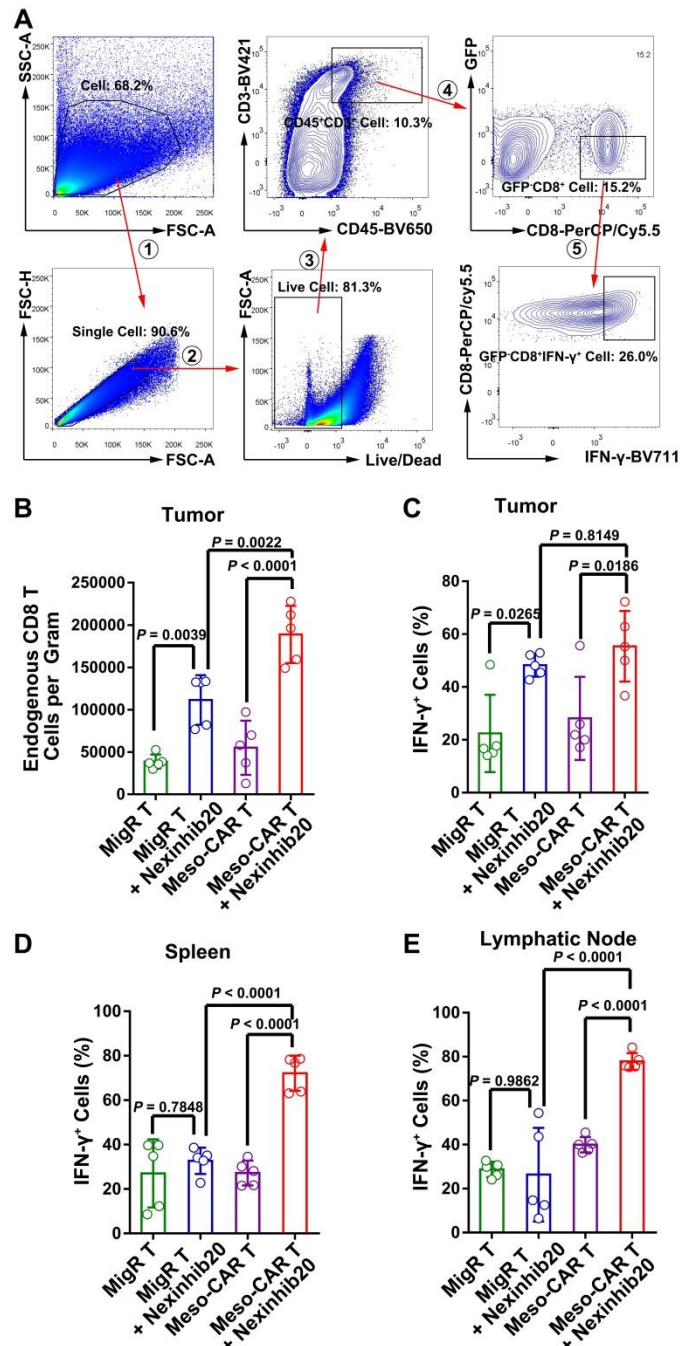

**Figure S20. Combination of Meso-CAR T cells and Nexinhib20 systemically enhanced the activation of CD8 T cells in immune competent mice with PDAC.** **A**, Representative contour plots showing the general gating strategy used in the analysis of total CD8 T cells and IFN- $\gamma$ <sup>+</sup> CD8 T cells in C57BL/6 mice with 4662 xenografts. **B**, The number of CD8 T cells in tumors for each group of mice quantified from flow cytometry analysis. **C-E**, The percentage of IFN- $\gamma$ <sup>+</sup> CD8 T cells in tumors (**C**), spleen (**D**) and lymphatic nodes (**E**) as quantified by flow cytometry. Data represent mean  $\pm$  s.d. (n=5). Statistical analysis is performed using Welch ANOVA with Dunnett's T3 multiple comparison (**B-E**).

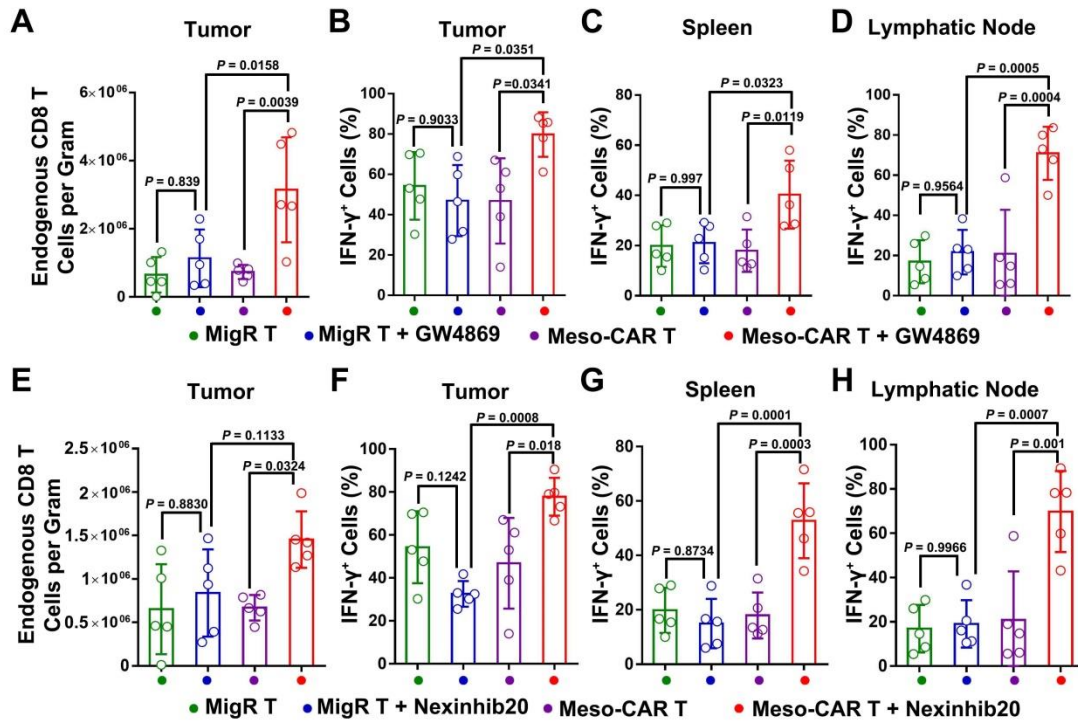

**Figure S21. Combination of Meso-CAR T cells and GW4869 or Nexinhib20 systemically enhanced the activation of CD8 T cells in immune competent mice with MOC1 tumors. A,** The number of CD8 T cells in tumors for each group of mice quantified from flow cytometry analysis. **B-D,** The percentage of IFN- $\gamma$ <sup>+</sup> CD8 T cells in tumors (**B**), spleen (**C**) and lymphatic nodes (**D**) as quantified from flow cytometry. **E,** The number of CD8 T cells in tumors for each group of mice quantified from flow cytometry analysis. **F-H,** The percentage of IFN- $\gamma$ <sup>+</sup> CD8 T cells in tumors (**F**), spleen (**G**) and lymphatic nodes (**H**) as quantified from flow cytometry. Data represent mean  $\pm$  s.d. (n=5). Statistical analysis is performed using Welch ANOVA with Dunnett's T3 multiple comparison (**A-H**).

**Table S1. Antibody Information**

| Antibody                      | Provider                  | Application       | Dilution                                                     | Identifier                           |
|-------------------------------|---------------------------|-------------------|--------------------------------------------------------------|--------------------------------------|
| Anti-mouse mesothelin         | Abcam                     | WB                | 1 : 10000                                                    | Cat#: ab213174<br>RRID:N/A           |
| Anti-mouse mesothelin, biotin | Biorbyt                   | Depletion         | 1 : 20                                                       | Cat#: orb241037<br>RRID:N/A          |
| Anti-mouse PD-L1              | Cell Signaling Technology | WB, TEM           | 1 : 10000                                                    | Cat#: 60475<br>RRID:AB_2924680       |
| Anti-mouse mesothelin         | Thermo Fisher             | Blocking, WB, TEM | 10 µg/ml for Blocking;<br>1 : 10000 for WB;<br>1: 50 for TEM | Cat#: MA5-38575<br>RRID:AB_2898487   |
| Anti-mouse CD63               | Abcam                     | WB                | 1 : 10000                                                    | Cat#: ab217345<br>RRID:AB_2754982    |
| Anti-mouse PD-L1              | Bio X Cell                | Blocking          | 10 µg/ml                                                     | Cat#: BE0101;<br>RRID:AB_10949073    |
| Mouse IgG isotype control     | BioLegend                 | Blocking          | 10 µg/ml                                                     | Cat#: 401404<br>RRID:N/A             |
| Rat IgG isotype control       | Bio X Cell                | Blocking          | 10 µg/ml                                                     | Cat#: BE0090<br>RRID:AB_1107780      |
| Anti-mouse IFN-γ              | BioLegend                 | FCM               | 1 : 50                                                       | Cat#:505836<br>RRID:AB_2650928       |
| Anti-mouse TNF-α              | BioLegend                 | FCM               | 1 : 50                                                       | Cat#: 506344<br>RRID:AB_2565953      |
| Anti-active Caspase-3         | BD Biosciences            | FCM               | 1 : 50                                                       | Cat#: 560901;<br>RRID:AB_10563896    |
| Anti-human Ki-67              | BD Biosciences            | FCM               | 1 : 100                                                      | Cat#: 561283<br>RRID:AB_10716060     |
| Anti-human Granzyme B         | Thermo Fisher             | FCM               | 1 : 100                                                      | Cat#: GRB04<br>RRID:AB_2536538       |
| Anti-mouse Ki-67              | BioLegend                 | FCM               | 1 : 50                                                       | Cat#: 652420<br>RRID:AB_2564285      |
| Anti-mouse Granzyme B         | eBioscience               | FCM               | 1 : 50                                                       | Cat#: 12-8898-82<br>RRID:AB_10870787 |
| Anti-human TNF-α              | BioLegend                 | FCM               | 1 : 100                                                      | Cat#: 502944<br>RRID:AB_2562870      |
| Anti-human IFN-γ              | BioLegend                 | FCM               | 1 : 100                                                      | Cat#: 502538<br>RRID:AB_2563608      |

|                                                             |                           |     |          |                                     |
|-------------------------------------------------------------|---------------------------|-----|----------|-------------------------------------|
| Anti-mouse CD8                                              | BioLegend                 | FCM | 1 : 100  | Cat#: 126610<br>RRID:AB_2260149     |
| Anti-mouse CD3                                              | BioLegend                 | FCM | 1 : 100  | Cat#:100228<br>RRID:AB_2562553      |
| Anti-mouse CD8                                              | Cell Signaling Technology | IF  | 1 : 100  | Cat#: 98941<br>RRID:AB_2756376      |
| Anti-human CD63                                             | Abcam                     | WB  | 1 : 1000 | Cat#: ab134045<br>RRID:AB_2800495   |
| Anti-Hrs                                                    | Cell Signaling Technology | WB  | 1 : 1000 | Cat#: 15087S<br>RRID:N/A            |
| Anti-TSG101                                                 | Abcam                     | WB  | 1 : 1000 | Cat#: ab125011<br>RRID:AB_10974262  |
| Anti-human PD-L1                                            | Cell Signaling Technology | WB  | 1 : 1000 | Cat#: 13684S<br>RRID:N/A            |
| Anti-human CD9                                              | Cell Signaling Technology | WB  | 1 : 1000 | Cat#: 13174S<br>RRID:N/A            |
| Anti-GAPDH                                                  | Cell Signaling Technology | WB  | 1 : 2000 | Cat#: 5174S<br>RRID:N/A             |
| Anti-Mouse IgG,<br>F(ab') <sub>2</sub> fragment<br>specific | Jackson<br>ImmunoResearch | FCM | 1 : 100  | Cat#: 115-475-072<br>RRID:N/A       |
| Anti-active<br>Caspase-3                                    | BD Biosciences            | FCM | 1 : 50   | Cat#: 560626<br>RRID:AB_1727414     |
| Anti-Trastuzumab                                            | R&D Systems               | FCM | 1 : 100  | Cat#: FAB95471R<br>RRID:N/A         |
| Anti-GFP                                                    | Cell Signaling Technology | WB  | 1 : 1000 | Cat#: 2956<br>RRID:AB_1196615       |
| Anti-CD19                                                   | Cell Signaling Technology | WB  | 1 : 1000 | Cat#: 90176<br>RRID:AB_2800152      |
| Anti-mouse CD25                                             | BioLegend                 | FCM | 1:100    | Cat#: 102038<br>RRID: AB_2563060    |
| Anti-mouse CD69                                             | eBioscience               | FCM | 1:100    | Cat#: 12-0691-82<br>RRID:AB_465732  |
| Anti-mouse<br>mesothelin                                    | LSBio                     | FCM | 1 : 100  | Cat#:<br>LS-C179484-100<br>RRID:N/A |

WB: Western Blotting; IF: Immunofluorescence; FCM: Flow cytometry.
